# Supplementary material
Source: HighWire-hosted journal article supplement (https://bmjopen.bmj.com/content/6/9/e013205)
Supplement: inline-supplementary-material-1 [file inline-supplementary-material-1.pdf]

**Table E1.** Comparisons of total EMS time per week.

| Week | 2011 |        |     | Control Period |        |     | 2011 vs Control |           |
|------|------|--------|-----|----------------|--------|-----|-----------------|-----------|
|      | n    | median | IQR | n              | median | IQR | chi sq.         | P value † |
| 0    | 162  | 29     | 19  | 125            | 30     | 13  | 0.04            | 0.83      |
| 1    | 62   | 41     | 29  | 121            | 31     | 18  | 14.04           | 0.00      |
| 2    | 49   | 48     | 36  | 105            | 29     | 14  | 24.12           | 0.00      |
| 3    | 32   | 38     | 22  | 122            | 30     | 15  | 5.67            | 0.02      |
| 4    | 56   | 42     | 31  | 126            | 31     | 20  | 17.76           | 0.00      |
| 5    | 34   | 40     | 27  | 126            | 31     | 13  | 15.24           | 0.00      |
| 6    | 39   | 36     | 18  | 116            | 27     | 12  | 6.33            | 0.01      |
| 7    | 50   | 39     | 26  | 147            | 35     | 21  | 3.64            | 0.06      |
| 8    | 41   | 32     | 17  | 129            | 30     | 18  | 3.08            | 0.08      |
| 9    | 51   | 42     | 26  | 109            | 32     | 17  | 6.53            | 0.01      |
| 10   | 52   | 34     | 13  | 107            | 30     | 15  | 7.07            | 0.01      |
| 11   | 51   | 31     | 16  | 119            | 28     | 10  | 4.14            | 0.04      |
| 12   | 44   | 32     | 11  | 107            | 30     | 19  | 0.70            | 0.40      |
| 13   | 51   | 35     | 14  | 116            | 30     | 13  | 8.28            | 0.00      |
| 14   | 43   | 32     | 10  | 113            | 29     | 16  | 2.07            | 0.15      |
| 15   | 42   | 29     | 8   | 94             | 30     | 18  | 0.30            | 0.58      |
| 16   | 52   | 32     | 13  | 134            | 32     | 21  | 0.16            | 0.69      |
| 17   | 54   | 30     | 14  | 133            | 29     | 16  | 0.18            | 0.67      |
| 18   | 47   | 33     | 12  | 151            | 33     | 19  | 0.24            | 0.63      |
| 19   | 49   | 31     | 13  | 141            | 29     | 18  | 0.36            | 0.55      |
| 20   | 53   | 30     | 13  | 132            | 28     | 10  | 1.15            | 0.28      |
| 21   | 59   | 31     | 12  | 145            | 31     | 16  | 0.28            | 0.60      |
| 22   | 79   | 30     | 9   | 168            | 32     | 18  | 0.00            | 0.98      |
| 23   | 49   | 30     | 11  | 127            | 32     | 15  | 0.88            | 0.35      |
| 24   | 50   | 34     | 10  | 116            | 30     | 15  | 2.39            | 0.12      |
| 25   | 52   | 33     | 16  | 123            | 30     | 14  | 3.17            | 0.07      |
| 26   | 39   | 33     | 11  | 127            | 32     | 22  | 0.03            | 0.85      |
| 27   | 57   | 33     | 16  | 98             | 30     | 21  | 1.49            | 0.22      |
| 28   | 55   | 30     | 19  | 123            | 29     | 14  | 0.28            | 0.60      |
| 29   | 55   | 33     | 14  | 116            | 30     | 17  | 2.01            | 0.16      |
| 30   | 51   | 32     | 17  | 122            | 33     | 19  | 0.07            | 0.79      |
| 31   | 51   | 31     | 15  | 134            | 31     | 18  | 0.00            | 0.96      |
| 32   | 52   | 31     | 11  | 112            | 30     | 16  | 0.05            | 0.83      |
| 33   | 52   | 31     | 12  | 113            | 29     | 15  | 0.26            | 0.61      |
| 34   | 41   | 29     | 10  | 135            | 29     | 16  | 0.21            | 0.65      |
| 35   | 52   | 32     | 11  | 129            | 30     | 19  | 1.12            | 0.29      |
| 36   | 54   | 34     | 13  | 133            | 34     | 21  | 0.07            | 0.80      |
| 37   | 57   | 33     | 17  | 141            | 33     | 17  | 0.02            | 0.89      |
| 38   | 43   | 33     | 10  | 114            | 33     | 14  | 0.03            | 0.87      |
| 39   | 61   | 32     | 15  | 124            | 32     | 16  | 1.35            | 0.25      |
| 40   | 52   | 30     | 17  | 128            | 31     | 17  | 0.69            | 0.41      |
| 41   | 48   | 33     | 12  | 155            | 31     | 18  | 1.27            | 0.26      |

† The P value was calculated with the use of a Mann-Whitney U test.
