# Supplementary material
Source: HighWire-hosted journal article supplement (https://bmjopen.bmj.com/content/6/9/e013205)

Figure E1: The relationship of total EMS time and the timing of closing and reopening of hospitals. Each letter corresponds to the hospital ID in figure 1.

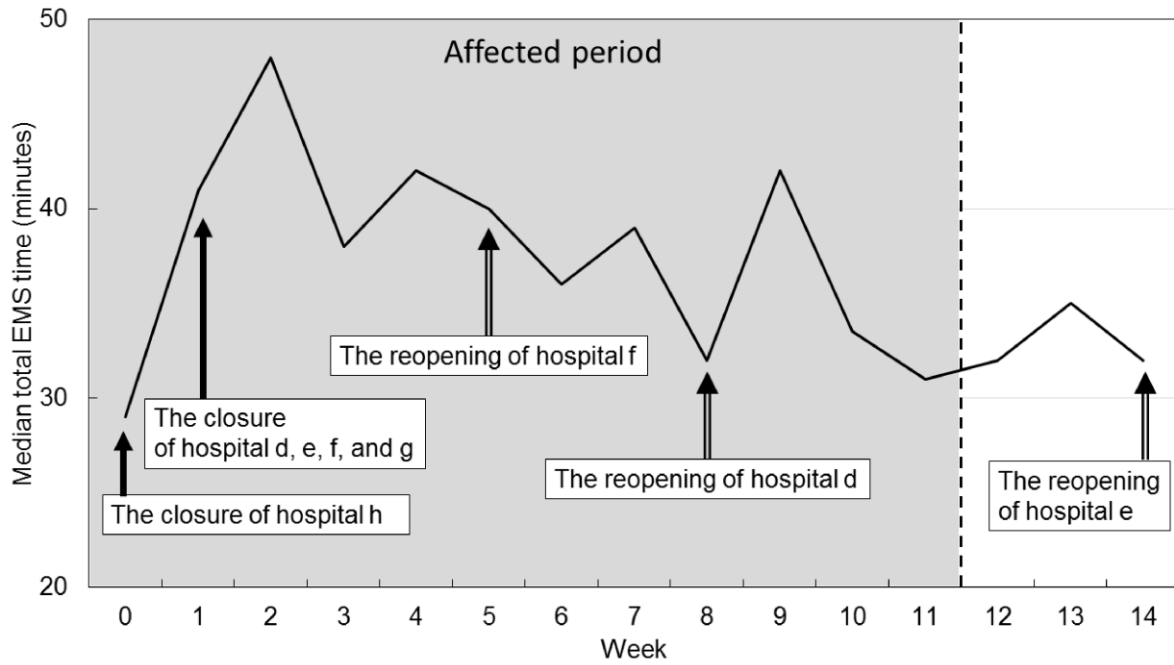

Supplement: inline-supplementary-material-2 [file inline-supplementary-material-2.pdf]
